# Supplementary material for: Similar hypoglycemic effects of glucomannan and its enzyme degraded products from Amorphophallus albus on type 2 diabetes mellitus in mice and potential mechanisms
Source: Royal Society of Chemistry journal article supplement (doi:10.1039/d0fo02434a), 2020-01-01

## Supplementary Figure Captions

Supplementary Fig. 1 Effects of AGM and its enzyme degraded products on the contents of propionic acid (A), isobutyric acid (B), butyric acid (C), isopentanoic acid (D), and pentanoic acid (E). The different lowercase letters indicate significant differences ( $p < 0.05$ ).

Supplementary Fig. 2 Schematic diagram of metabolic pathway networks for potential biomarkers in HFD-STZ-induced T2DM model. The identified potential biomarkers were marked in red (up-regulated in MC group) and green (down-regulated in MC group).

# Supplementary Fig. 1

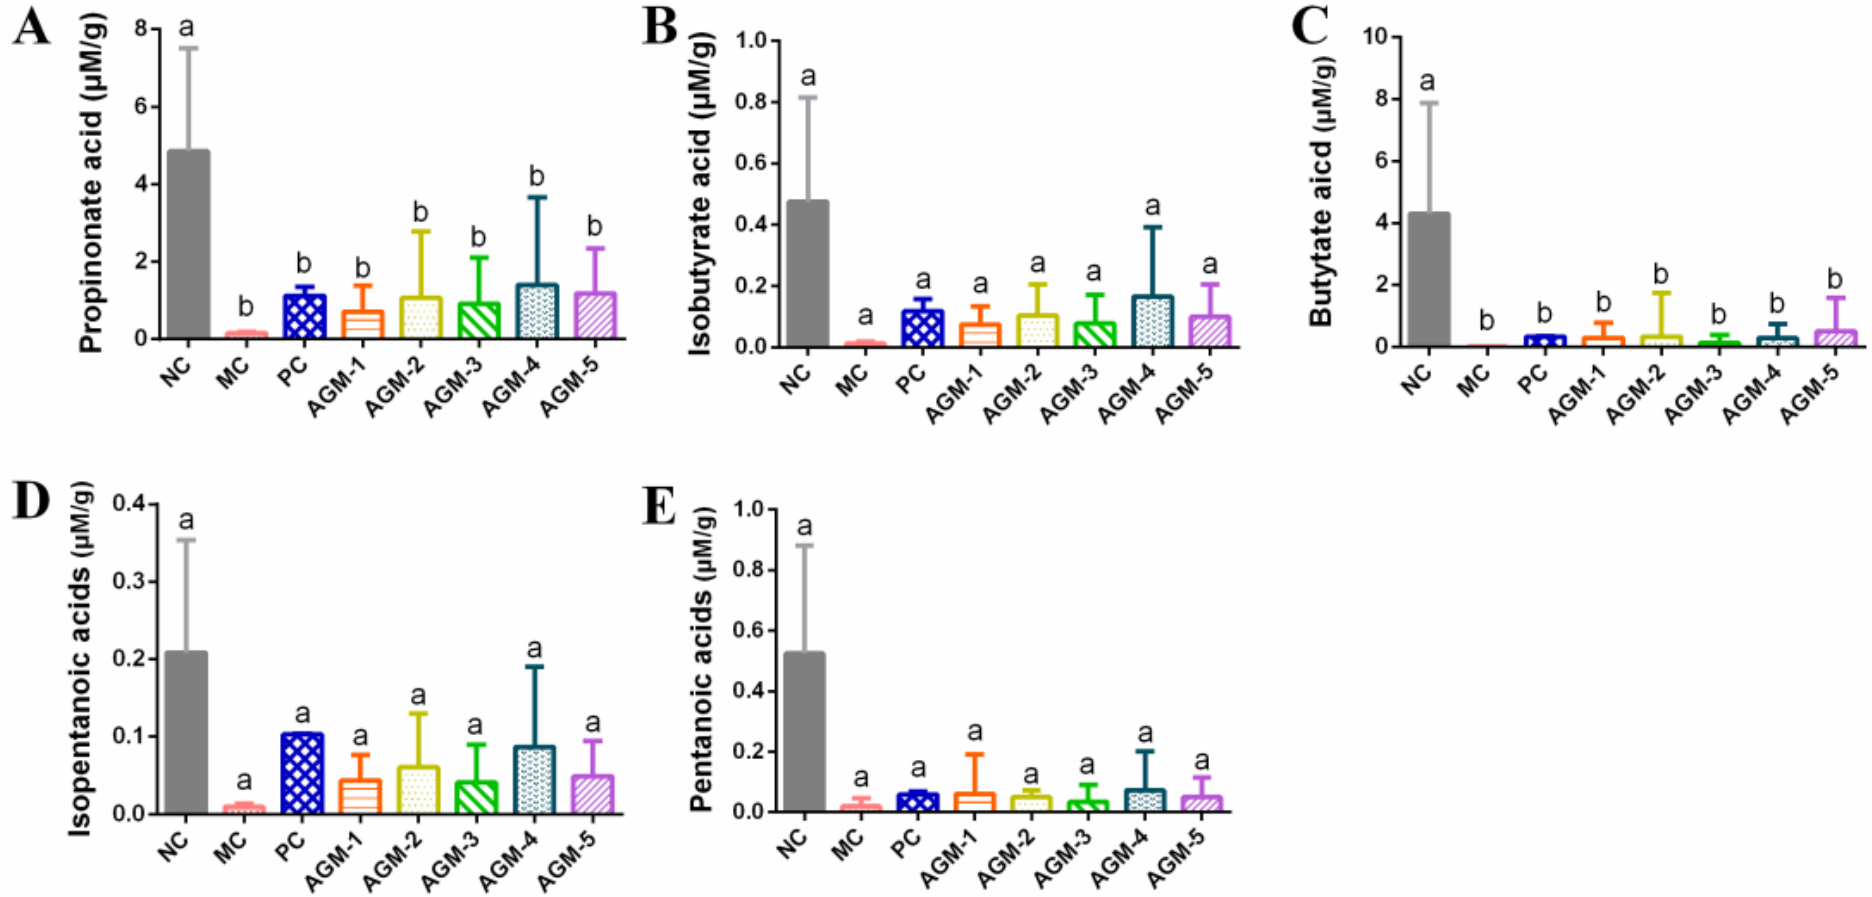

Supplementary Fig. 2

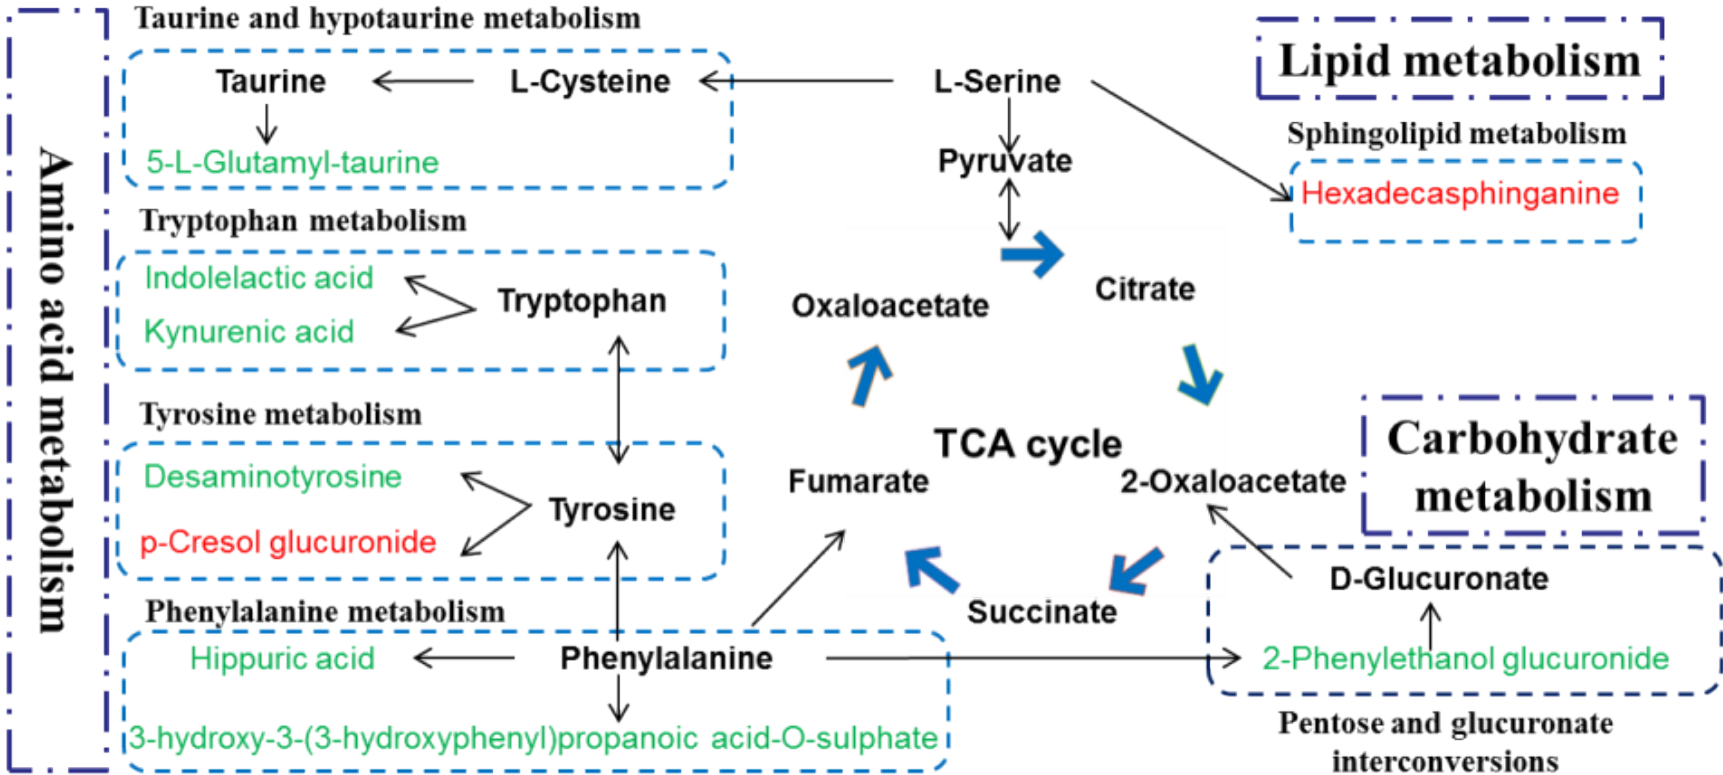

Supplement: d0fo02434a1.pdf [file d0fo02434a1.pdf]
