# Supplementary material for: Similar hypoglycemic effects of glucomannan and its enzyme degraded products from Amorphophallus albus on type 2 diabetes mellitus in mice and potential mechanisms
Source: Royal Society of Chemistry journal article supplement (doi:10.1039/d0fo02434a), 2020-01-01
Supplement: d0fo02434a2.pdf [file d0fo02434a2.pdf]

### Supplementary Table 1

#### UPLC-QTOF-MS instrument conditions

|                       |                             |                                                                                                 |    |    |              |    |    |
|-----------------------|-----------------------------|-------------------------------------------------------------------------------------------------|----|----|--------------|----|----|
| <b>UPLC condition</b> | Mobile phase                | A: water containing 0.1% (v/v) formic acid<br>B: Acetonitrile containing 0.1% (v/v) formic acid |    |    |              |    |    |
|                       | Gradient time (min)         | 0                                                                                               | 2  | 10 | 12           | 13 | 15 |
|                       | A (%)                       | 95                                                                                              | 95 | 5  | 5            | 95 | 95 |
|                       | B (%)                       | 5                                                                                               | 5  | 95 | 95           | 5  | 5  |
|                       | Total flow                  | 0.4 mL/min                                                                                      |    |    |              |    |    |
|                       | Temperature of column oven  | 35 °C                                                                                           |    |    |              |    |    |
|                       | Column                      | Waters ACQUITY HSS T3 column (2.1 × 100 mm, i.d., 1.8 µm)                                       |    |    |              |    |    |
| <b>MS condition</b>   | Ionisation mode             | ESI positive                                                                                    |    |    | ESI negative |    |    |
|                       | Collision energy            | 20-40 eV                                                                                        |    |    |              |    |    |
|                       | Capillary voltage           | 2.5 kV                                                                                          |    |    |              |    |    |
|                       | Cone voltage                | 40V                                                                                             |    |    |              |    |    |
|                       | Desolvation gas             | 800 L/h                                                                                         |    |    |              |    |    |
|                       | Cone gas                    | 50 L/h                                                                                          |    |    |              |    |    |
|                       | Source temperature          | 100° C                                                                                          |    |    |              |    |    |
|                       | Desolvation gas temperature | 450° C                                                                                          |    |    |              |    |    |
|                       | Scan time                   | 0.5 s                                                                                           |    |    |              |    |    |
|                       | Inter-scan time             | 0.1 s                                                                                           |    |    |              |    |    |
|                       | Mass range                  | 50 to 1500 Da                                                                                   |    |    |              |    |    |
